# Supplementary material for: Effects of Intragastric Administration of Tryptophan on the Blood Glucose Response to a Nutrient Drink and Energy Intake, in Lean and Obese Men
Source: PubMed Central journal article supplement (PMC5946248; doi:10.3390/nu10040463), 2018-04-08
Supplement: nutrients-10-00463-s001.pdf [file nutrients-10-00463-s001.pdf]

# Supplemental Figure 1

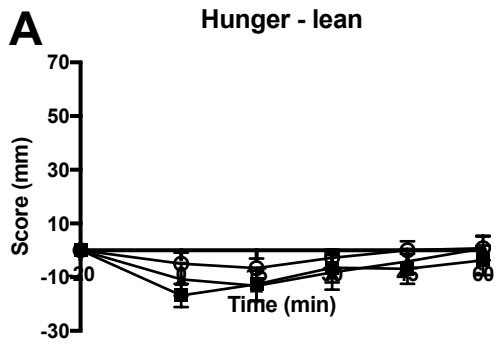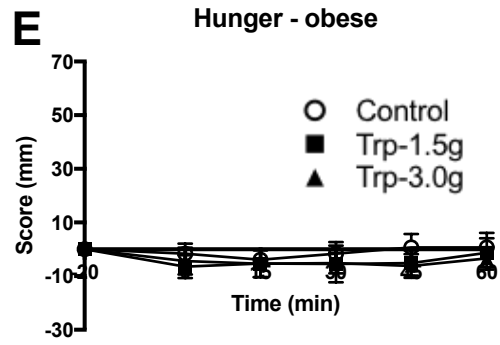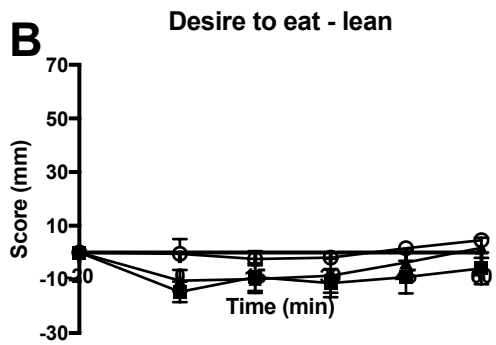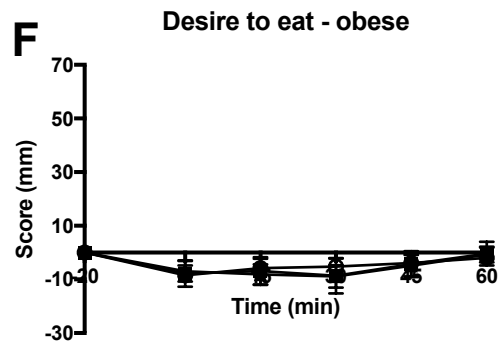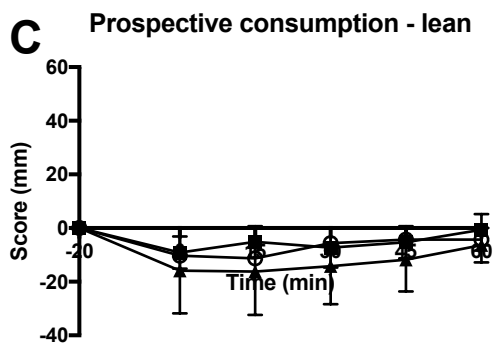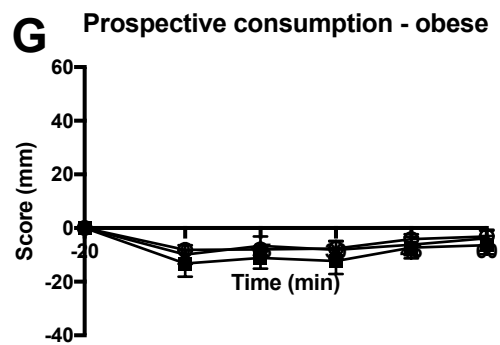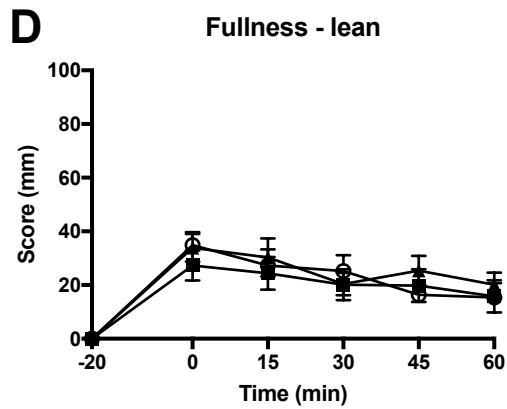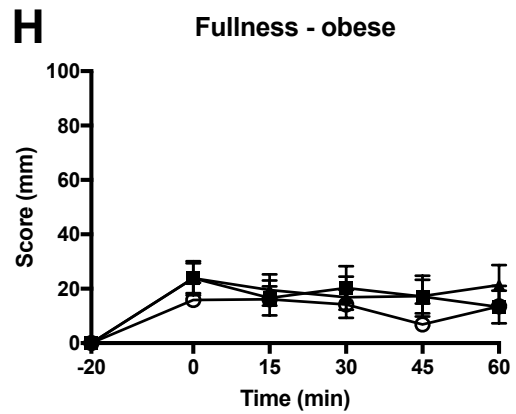

**Supplemental Figure 1:** Hunger (A, E), desire to eat (B, F), prospective consumption (C, G) and fullness (D, H) at baseline (t=-20 min) and in response to an oral mixed-nutrient drink (t=0 min) following intragastric infusion of tryptophan, at doses of 1.5 g ('Trp-1.5g') or 3.0 g ('Trp-3.0g'), or control, in healthy normal-weight (A-D) and obese (E-H) volunteers. Data are means±SEM, n=16.

## Supplemental Figure 2

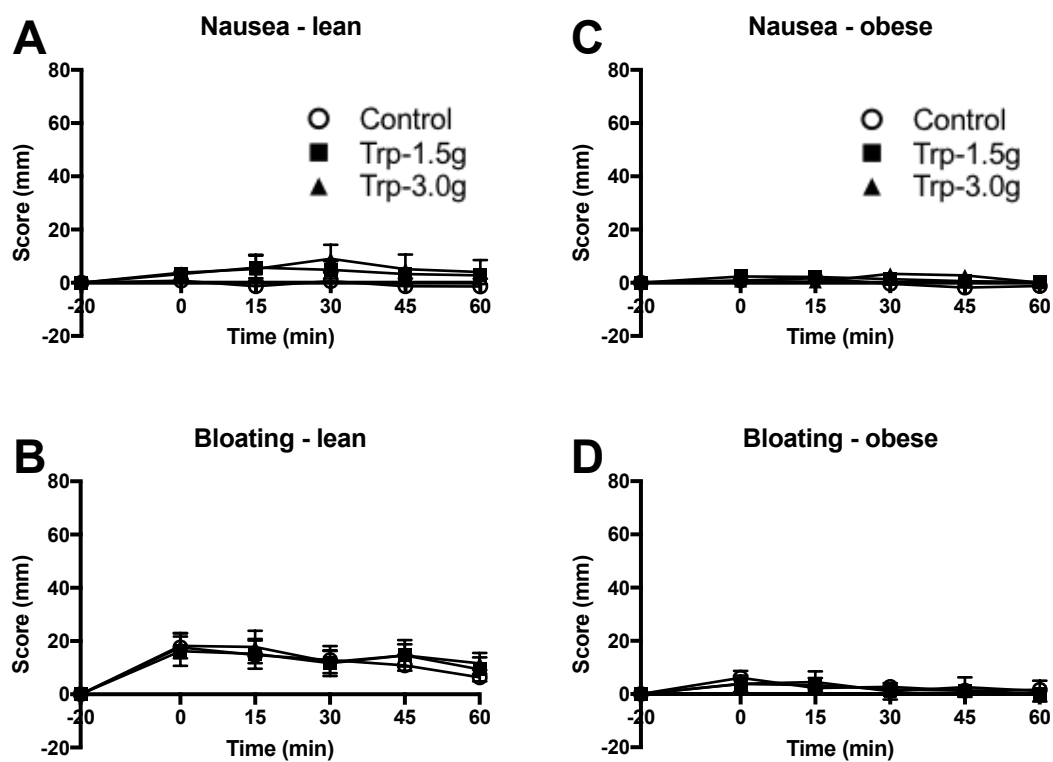

**Supplemental Figure 2:** Nausea (A, C) and bloating (B, D) at baseline ( $t=-20$  min) and in response to an oral mixed-nutrient drink ( $t=0$  min) following intragastric infusion of tryptophan, at doses of 1.5 g ('Trp-1.5g') or 3.0 g ('Trp-3.0g'), or control, in healthy normal-weight (A, B) and obese (C, D) volunteers. Data are means $\pm$ SEM,  $n=16$ .
